# Supplementary material for: CpG Island Mapping by Epigenome Prediction
Source: PLOS journal article supplement (doi:10.1371/journal.pcbi.0030110), 2007-06-05
Supplement: S7 (10.1371/journal.pcbi.0030110.s007) [file journal.pcbi.0030110.s007]

# Supplementary Table 7 – Correlation among the epigenome predictions that contribute to the open chromatin score

## A. Correlation among epigenome predictions at CpG islands, TJU-based

|                                                |                     | Correlations                   |                                |                                         |                                       |                                    |                       |
|------------------------------------------------|---------------------|--------------------------------|--------------------------------|-----------------------------------------|---------------------------------------|------------------------------------|-----------------------|
|                                                |                     | Predicted overlap with H3K4Me2 | Predicted overlap with H3K4Me3 | Predicted overlap with H3K9ac / H3K14ac | Predicted overlap with DNaseI hypers. | Predicted overlap with Sp1 binding | Open CpG island score |
| Predicted overlap with H3K4Me2                 | Pearson Correlation | 1                              | .596**                         | .599**                                  | .566**                                | .448**                             | .772**                |
|                                                | Sig. (2-tailed)     |                                | .000                           | .000                                    | .000                                  | .000                               | .000                  |
|                                                | N                   | 37531                          | 37531                          | 37531                                   | 37531                                 | 37531                              | 37531                 |
| Predicted overlap with H3K4Me3                 | Pearson Correlation | .596**                         | 1                              | .890**                                  | .602**                                | .572**                             | .874**                |
|                                                | Sig. (2-tailed)     | .000                           |                                | .000                                    | .000                                  | .000                               | .000                  |
|                                                | N                   | 37531                          | 37531                          | 37531                                   | 37531                                 | 37531                              | 37531                 |
| Predicted overlap with H3K9ac / H3K14ac        | Pearson Correlation | .599**                         | .890**                         | 1                                       | .601**                                | .553**                             | .870**                |
|                                                | Sig. (2-tailed)     | .000                           | .000                           |                                         | .000                                  | .000                               | .000                  |
|                                                | N                   | 37531                          | 37531                          | 37531                                   | 37531                                 | 37531                              | 37531                 |
| Predicted overlap with DNaseI hypersensitivity | Pearson Correlation | .566**                         | .602**                         | .601**                                  | 1                                     | .711**                             | .836**                |
|                                                | Sig. (2-tailed)     | .000                           | .000                           | .000                                    |                                       | .000                               | .000                  |
|                                                | N                   | 37531                          | 37531                          | 37531                                   | 37531                                 | 37531                              | 37531                 |
| Predicted overlap with Sp1 binding             | Pearson Correlation | .448**                         | .572**                         | .553**                                  | .711**                                | 1                                  | .803**                |
|                                                | Sig. (2-tailed)     | .000                           | .000                           | .000                                    | .000                                  |                                    | .000                  |
|                                                | N                   | 37531                          | 37531                          | 37531                                   | 37531                                 | 37531                              | 37531                 |
| Open CpG island score                          | Pearson Correlation | .772**                         | .874**                         | .870**                                  | .836**                                | .803**                             | 1                     |
|                                                | Sig. (2-tailed)     | .000                           | .000                           | .000                                    | .000                                  | .000                               |                       |
|                                                | N                   | 37531                          | 37531                          | 37531                                   | 37531                                 | 37531                              | 37531                 |

\*\* . Correlation is significant at the 0.01 level (2-tailed).

## B. Correlation among epigenome predictions at CpG islands, GGF-based

|                                                |                     | Correlations                   |                                |                                         |                                       |                                    |                       |
|------------------------------------------------|---------------------|--------------------------------|--------------------------------|-----------------------------------------|---------------------------------------|------------------------------------|-----------------------|
|                                                |                     | Predicted overlap with H3K4Me2 | Predicted overlap with H3K4Me3 | Predicted overlap with H3K9ac / H3K14ac | Predicted overlap with DNaseI hypers. | Predicted overlap with Sp1 binding | Open CpG island score |
| Predicted overlap with H3K4Me2                 | Pearson Correlation | 1                              | .842**                         | .791**                                  | .764**                                | .607**                             | .909**                |
|                                                | Sig. (2-tailed)     |                                | .000                           | .000                                    | .000                                  | .000                               | .000                  |
|                                                | N                   | 94450                          | 94450                          | 94450                                   | 94450                                 | 94450                              | 94450                 |
| Predicted overlap with H3K4Me3                 | Pearson Correlation | .842**                         | 1                              | .849**                                  | .715**                                | .623**                             | .916**                |
|                                                | Sig. (2-tailed)     | .000                           |                                | .000                                    | .000                                  | .000                               | .000                  |
|                                                | N                   | 94450                          | 94450                          | 94450                                   | 94450                                 | 94450                              | 94450                 |
| Predicted overlap with H3K9ac / H3K14ac        | Pearson Correlation | .791**                         | .849**                         | 1                                       | .741**                                | .663**                             | .921**                |
|                                                | Sig. (2-tailed)     | .000                           | .000                           |                                         | .000                                  | .000                               | .000                  |
|                                                | N                   | 94450                          | 94450                          | 94450                                   | 94450                                 | 94450                              | 94450                 |
| Predicted overlap with DNaseI hypersensitivity | Pearson Correlation | .764**                         | .715**                         | .741**                                  | 1                                     | .521**                             | .855**                |
|                                                | Sig. (2-tailed)     | .000                           | .000                           | .000                                    |                                       | .000                               | .000                  |
|                                                | N                   | 94450                          | 94450                          | 94450                                   | 94450                                 | 94450                              | 94450                 |
| Predicted overlap with Sp1 binding             | Pearson Correlation | .607**                         | .623**                         | .663**                                  | .521**                                | 1                                  | .784**                |
|                                                | Sig. (2-tailed)     | .000                           | .000                           | .000                                    | .000                                  |                                    | .000                  |
|                                                | N                   | 94450                          | 94450                          | 94450                                   | 94450                                 | 94450                              | 94450                 |
| Open CpG island score                          | Pearson Correlation | .909**                         | .916**                         | .921**                                  | .855**                                | .784**                             | 1                     |
|                                                | Sig. (2-tailed)     | .000                           | .000                           | .000                                    | .000                                  | .000                               |                       |
|                                                | N                   | 94450                          | 94450                          | 94450                                   | 94450                                 | 94450                              | 94450                 |

\*\* . Correlation is significant at the 0.01 level (2-tailed).

### C. Correlation among epigenome predictions at CpG islands, GGM-based

**Correlations**

|                                                |                     | Predicted overlap with H3K4Me2 | Predicted overlap with H3K4Me3 | Predicted overlap with H3K9ac / H3K14ac | Predicted overlap with DNaseI hypers. | Predicted overlap with Sp1 binding | Open CpG island score |
|------------------------------------------------|---------------------|--------------------------------|--------------------------------|-----------------------------------------|---------------------------------------|------------------------------------|-----------------------|
| Predicted overlap with H3K4Me2                 | Pearson Correlation | 1                              | .757**                         | .747**                                  | .719**                                | .541**                             | .838**                |
|                                                | Sig. (2-tailed)     |                                | .000                           | .000                                    | .000                                  | .000                               | .000                  |
|                                                | N                   | 109600                         | 109600                         | 109600                                  | 109600                                | 109600                             | 109600                |
| Predicted overlap with H3K4Me3                 | Pearson Correlation | .757**                         | 1                              | .925**                                  | .754**                                | .730**                             | .947**                |
|                                                | Sig. (2-tailed)     | .000                           |                                | .000                                    | .000                                  | .000                               | .000                  |
|                                                | N                   | 109600                         | 109600                         | 109600                                  | 109600                                | 109600                             | 109600                |
| Predicted overlap with H3K9ac / H3K14ac        | Pearson Correlation | .747**                         | .925**                         | 1                                       | .742**                                | .703**                             | .933**                |
|                                                | Sig. (2-tailed)     | .000                           | .000                           |                                         | .000                                  | .000                               | .000                  |
|                                                | N                   | 109600                         | 109600                         | 109600                                  | 109600                                | 109600                             | 109600                |
| Predicted overlap with DNaseI hypersensitivity | Pearson Correlation | .719**                         | .754**                         | .742**                                  | 1                                     | .563**                             | .857**                |
|                                                | Sig. (2-tailed)     | .000                           | .000                           | .000                                    |                                       | .000                               | .000                  |
|                                                | N                   | 109600                         | 109600                         | 109600                                  | 109600                                | 109600                             | 109600                |
| Predicted overlap with Sp1 binding             | Pearson Correlation | .541**                         | .730**                         | .703**                                  | .563**                                | 1                                  | .822**                |
|                                                | Sig. (2-tailed)     | .000                           | .000                           | .000                                    | .000                                  |                                    | .000                  |
|                                                | N                   | 109600                         | 109600                         | 109600                                  | 109600                                | 109600                             | 109600                |
| Open CpG island score                          | Pearson Correlation | .838**                         | .947**                         | .933**                                  | .857**                                | .822**                             | 1                     |
|                                                | Sig. (2-tailed)     | .000                           | .000                           | .000                                    | .000                                  | .000                               |                       |
|                                                | N                   | 109600                         | 109600                         | 109600                                  | 109600                                | 109600                             | 109600                |

\*\* . Correlation is significant at the 0.01 level (2-tailed).
